# Supplementary material for: Adsorptive separation of para-xylene by nonporous adaptive crystals of phenanthrene[2]arene
Source: Royal Society of Chemistry journal article supplement (doi:10.1039/d2ra03773d), 2022-01-01
Supplement: d2ra03773d1.pdf [file d2ra03773d1.pdf]

## Electronic Supplementary Information

### Adsorptive separation of *para*-xylene by nonporous adaptive crystals of Phenanthrene[2]arene

Ying Hou<sup>a</sup>, Yin-Rong Duan<sup>a</sup>, Man-Hua Ding <sup>a\*</sup>, Lin-Li Tang<sup>a</sup> and Fei Zeng<sup>a\*</sup>

<sup>a</sup>Department of Biology and Chemistry, Hunan University of Science and Engineering,  
Yongzhou 425199, China.

*E-mail: zengfei@iccas.ac.cn; 42979930@qq.com*

### Contents

|                                                                               |     |
|-------------------------------------------------------------------------------|-----|
| 1. Materials and Methods.....                                                 | S2  |
| 2. Synthesis of New compounds. ....                                           | S3  |
| 3. <sup>1</sup> H NMR and <sup>13</sup> C NMR Spectral of New compounds. .... | S4  |
| 4. Characterization of Activated 1 Crystals .....                             | S5  |
| 5. Single-Component <i>pX/mX</i> Adsorption Experiments.....                  | S6  |
| 6. Uptake from a <i>pX/mX</i> Mixture by activated 1 .....                    | S8  |
| 7. Recyclability of 1 .....                                                   | S10 |
| 8. Crystal data for 1@ <i>pX</i> and 1@ <i>2mX</i> .....                      | 12  |
| 9. Adsorption kinetic analysis using three models .....                       | 14  |

## 1. Materials and Methods.

All reactions were carried out with oven-dried glassware. Commercial reagents were used without further purification. Flash column chromatography was performed on 100-200 mesh silica gel.  $^1\text{H}$  NMR,  $^{13}\text{C}$  NMR spectra were recorded on a Bruker DMX400 NMR spectrometer. Melting points were determined using WRR melting point apparatus and were uncorrected. Activated host **1** was prepared by recrystallization in the mixture of  $\text{CH}_2\text{Cl}_2/\text{MeOH}$  and dried under vacuum at  $150\text{ }^\circ\text{C}$  for 6 h. High Resolution atmospheric-pressure chemical ionization mass spectra (APCI-MS) were determined by Bruker Daltonics. Inc, APEX II.

**Powder X-ray diffraction (PXRD) data** were collected on a Rigaku Ultimate-IV X-ray diffractometer operating at 40 kV/30 mA using the Cu  $K\alpha$  line ( $\lambda = 1.5418\text{ \AA}$ ). Data were measured over the range of  $5\text{-}45^\circ$  in  $5^\circ/\text{min}$  steps over 8 min.

**Thermogravimetric analysis (TGA)** was carried out using a Q5000IR analyzer (TA Instruments) with an automated vertical overhead thermobalance. The samples were heated at  $10\text{ }^\circ\text{C}/\text{min}$  using  $\text{N}_2$  as the protective gas.

**Low-pressure gas adsorption measurements (Gas Sorption Measurement)** were performed on a Micromeritics Accelerated Surface Area and Porosimetry System (ASAP) 2020 surface area analyzer. Samples were degassed under dynamic vacuum for 12 h at  $60\text{ }^\circ\text{C}$  prior to each measurement.  $\text{N}_2$  isotherms were measured using a liquid nitrogen bath (77 K).

**Gas Chromatography** Head Space Gas Chromatographic (HS-GC) Analysis: HS-GC measurements were carried out using GC-MS QP-2010 SE instrument configured with an FID detector and a RXT-5 column ( $30\text{ m} \times 0.53\text{ mm} \times 3.0\text{ }\mu\text{m}$ ). The GC method was described below: the oven was programmed to heat up from  $40\text{ }^\circ\text{C}$  to  $220\text{ }^\circ\text{C}$  with an increments of  $10\text{ }^\circ\text{C}/\text{min}$  with 10 min hold, resulting 38 min run time in total; the injection temperature was  $250\text{ }^\circ\text{C}$ ; the detection temperature was  $330\text{ }^\circ\text{C}$  with hydrogen, air, and make-up flow-rates of 40, 400, and 30 mL/min respectively; helium (carrier gas) flow-rate 2.1 mL/min. The samples were injected in the split mode (20:1). Numeric integration of the resulting peaks was performed using the

supplied ACD/ChemSketch and AI software package.

## 2. Synthesis of New compounds.

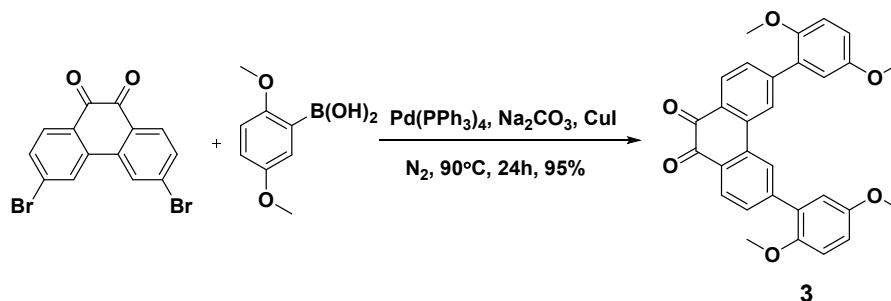

**Compound 3** A mixture of 3,6-dibromophenanthrene-9,10-dione (3.64 g, 10 mmol),  $\text{Na}_2\text{CO}_3$  (2.96 g, 28 mmol), 2,5-dimethoxyphenylboronic acid (4.00 g, 22 mmol) and tetrakis(triphenylphosphine)palladium ( 0.48 g, 0.42 mmol) in 100 mL dioxane and water (v/v = 5:1) in a flask was stirred at  $90^\circ\text{C}$  for 24 h under  $\text{N}_2$ . After being cooled to room temperature, the reaction mixture was poured into water, and the resulting red precipitate was washed with water and then dried under a vacuum to afford compound **2** (4.56 g, yield 95%) as a red solid. M.p.:  $225\text{--}227^\circ\text{C}$ .  $^1\text{H}$  NMR (400 MHz,  $\text{CDCl}_3$ )  $\delta$  8.20 (d,  $J = 8.0$  Hz, 2H), 8.15 (s, 2H), 7.59 (d,  $J = 8.0$  Hz, 2H), 7.00 – 6.89 (m, 6H), 3.80 (d,  $J = 15.5$  Hz, 12H).  $^{13}\text{C}$  NMR (101 MHz,  $\text{CDCl}_3$ )  $\delta$  180.29, 153.88, 150.77, 146.50, 135.76, 130.65, 130.29, 129.92, 129.63, 125.28, 116.39, 114.56, 112.85, 56.35, 55.89. HRMS (APCI) m/z:  $[\text{M}+\text{H}]^+$  calcd for  $\text{C}_{30}\text{H}_{25}\text{O}_6$ , 481.1651; found, 481.1654.

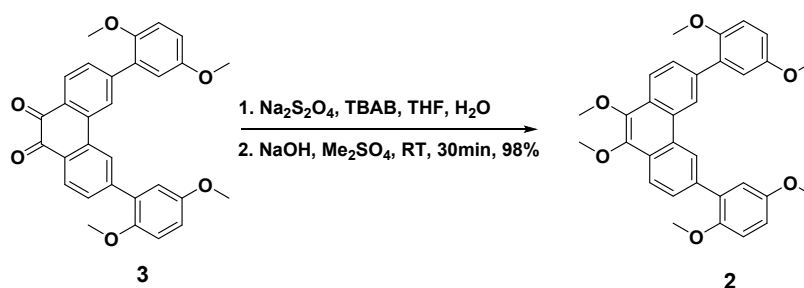

**Compound 2**  $\text{Bu}_4\text{NBr}$  (0.38 g, 1.2 mmol), compound **3** (1.44 g, 3.0 mmol), and  $\text{Na}_2\text{S}_2\text{O}_4$  (4.08 g, 12 mmol) were suspended in aqueous THF (1:1, 50 mL) and stirred until the reaction mixture was homogeneous.  $\text{Me}_2\text{SO}_4$  (2 mL) was slowly added, followed by a concentrated aq.  $\text{NaOH}$  solution (14 M, 5 mL). After stirring for 5 min,

ice (20 g) was slowly added over 5 min and the mixture was further stirred for 20 min. The resulting solid was filtered and dissolved in EtOAc (50 mL). The solution was washed with water ( $3 \times 100$  mL), dried over  $\text{Na}_2\text{SO}_4$ , filtered and concentrated in vacuo to afford the title compound **2** as white crystals (1.50 g, 98%). All data are consistent with the previous results that published by our group.  $^1\text{H}$  NMR (400 MHz,  $\text{CDCl}_3$ )  $\delta$  8.77 (s, 2H), 8.26 (d,  $J = 8.4$  Hz, 2H), 7.81 (d,  $J = 8.4$  Hz, 2H), 7.04 (d,  $J = 2.9$  Hz, 2H), 6.98 (d,  $J = 8.9$  Hz, 2H), 6.90 (dd,  $J = 8.9, 3.0$  Hz, 2H), 4.12 (s, 6H), 3.84 (s, 6H), 3.78 (s, 6H).  $^{13}\text{C}$  NMR (101 MHz,  $\text{CDCl}_3$ )  $\delta$  153.9, 151.0, 144.1, 136.0, 132.0, 128.7, 128.6, 128.2, 123.5, 121.7, 117.1, 113.2, 112.9, 61.1, 56.5, 55.9. HRMS (APCI)  $m/z$ :  $[\text{M}+\text{H}]^+$  calcd for  $\text{C}_{32}\text{H}_{31}\text{O}_6$ , 511.2121; found, 511.2128.

### 3. $^1\text{H}$ NMR and $^{13}\text{C}$ NMR Spectral of New compounds.

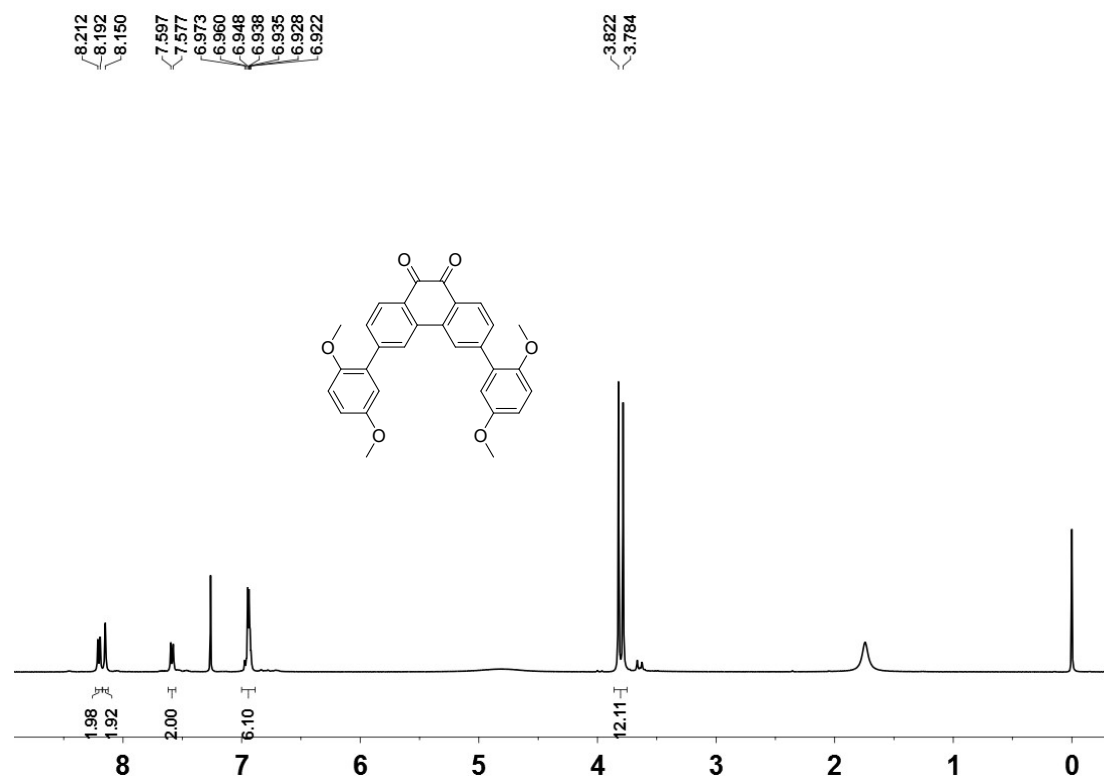

Figure S1.  $^1\text{H}$  NMR spectrum (400 MHz,  $\text{CDCl}_3$ , 298K) of **3**

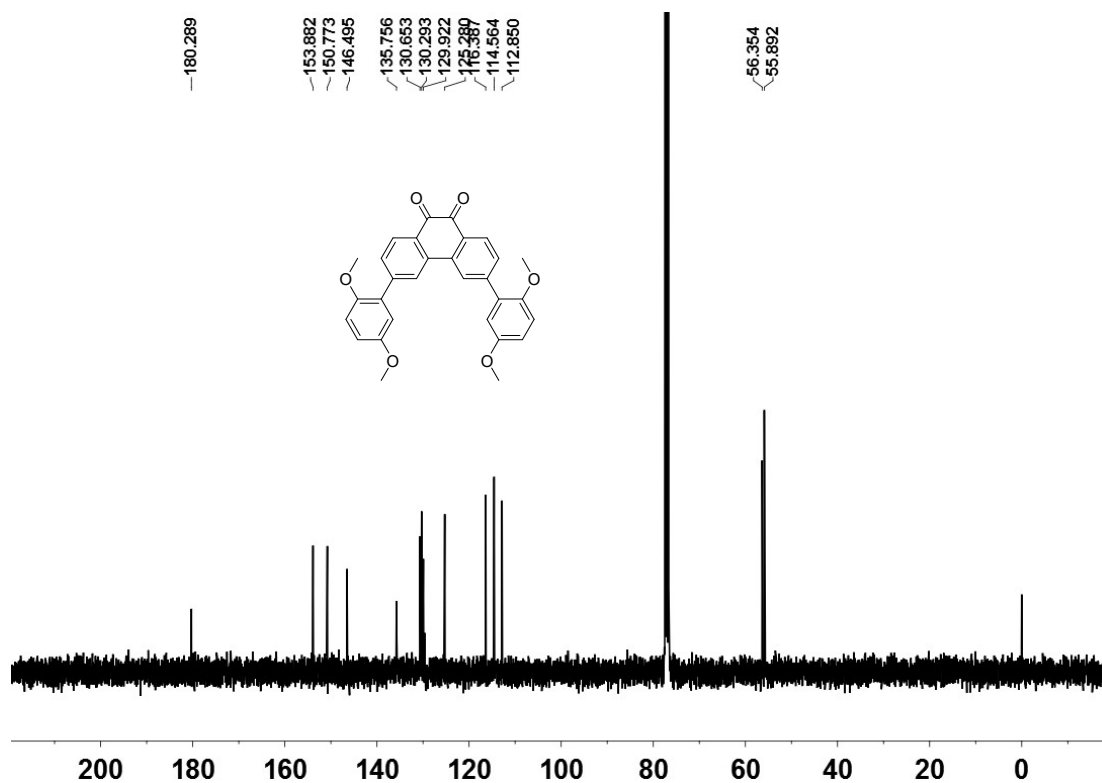

Figure S2.  $^{13}\text{C}$  NMR spectrum (101 MHz,  $\text{CDCl}_3$ , 298K) of **3**

#### 4. Characterization of Activated **1** Crystals

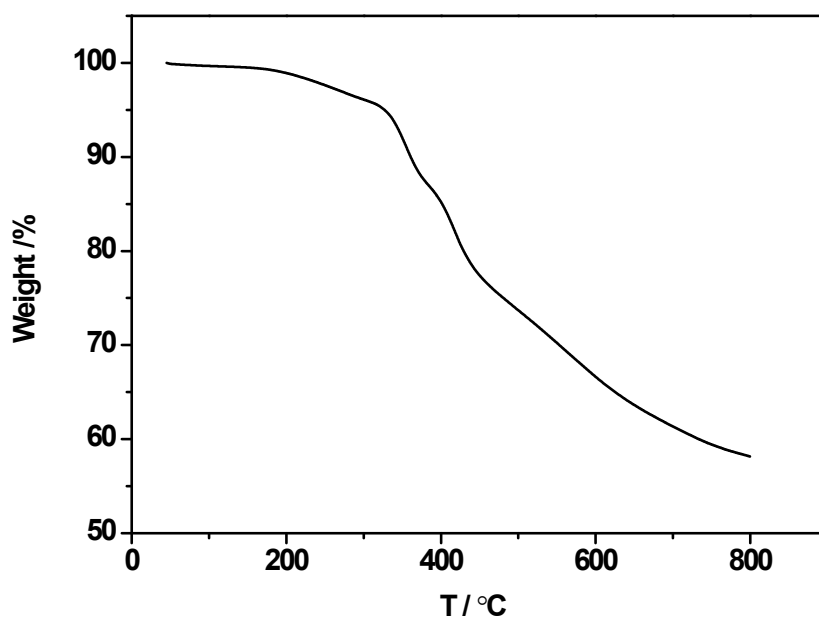

Figure S3. Thermogravimetric analysis of **1**

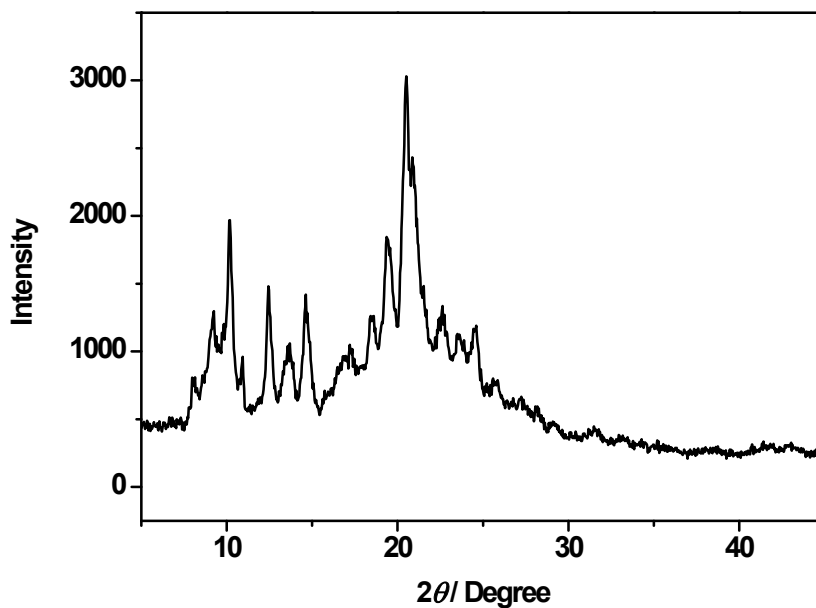

**Figure S4.** Powder X-ray diffraction pattern of **1**.

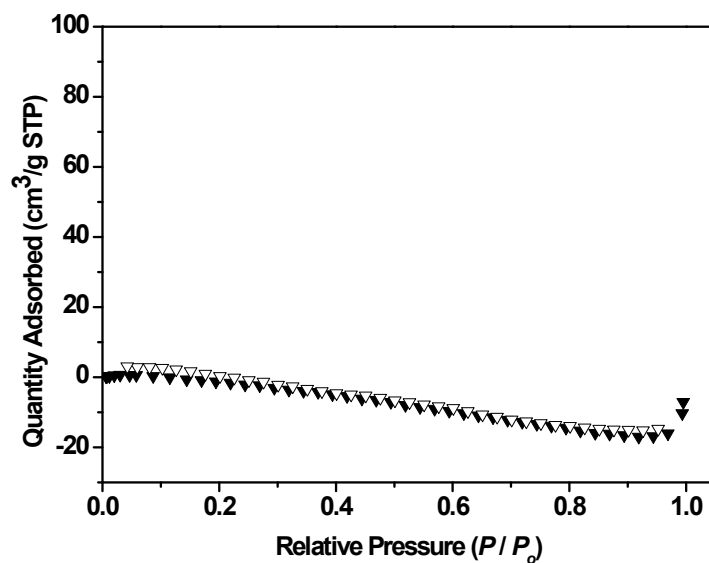

**Figure S5.** N<sub>2</sub> adsorption isotherm of **1**. The BET surface area value is 4.9971 m<sup>2</sup>/g. Adsorption, closed symbols; desorption, open symbols.

## 5. Single-Component *pX/mX* Adsorption Experiments

<sup>1</sup>H NMR experiments were performed by dissolving **1** after vapor sorption in CDCl<sub>3</sub>. TGA profiles were recorded using **1** after vapor sorption.

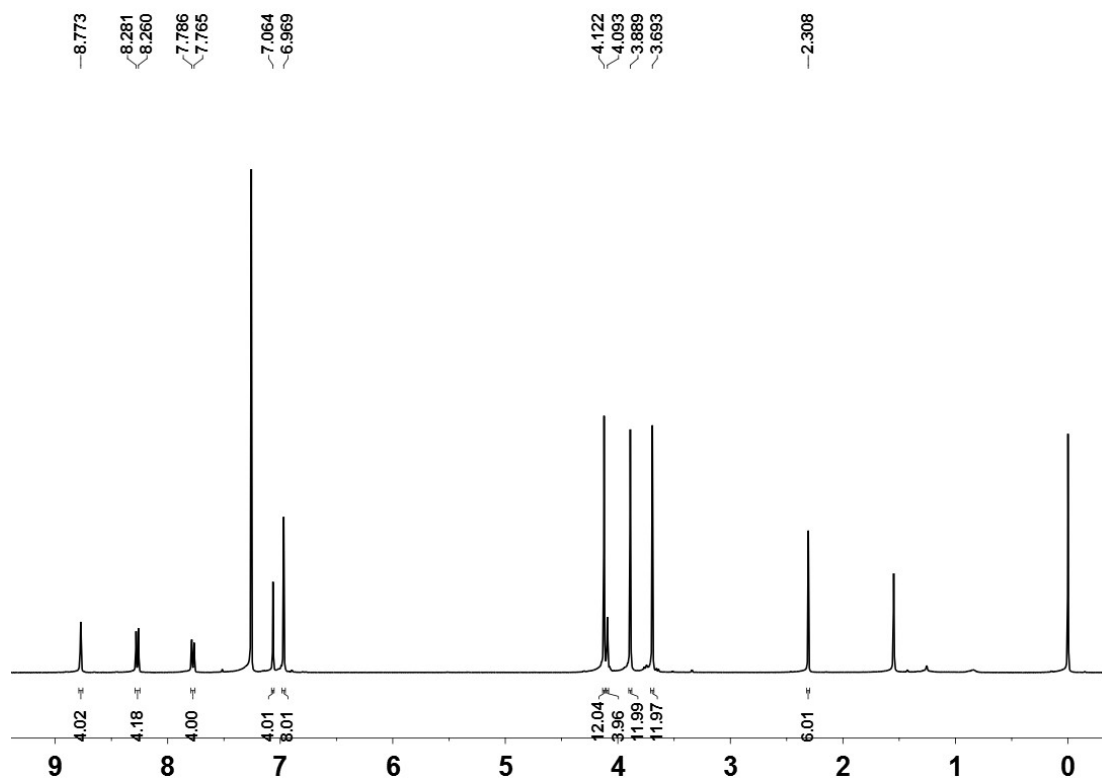

**Figure S6.**  $^1\text{H}$  NMR spectrum (400 MHz,  $\text{CDCl}_3$ , 293 K) of activated **1** after sorption of *pX* vapor for 20 h.

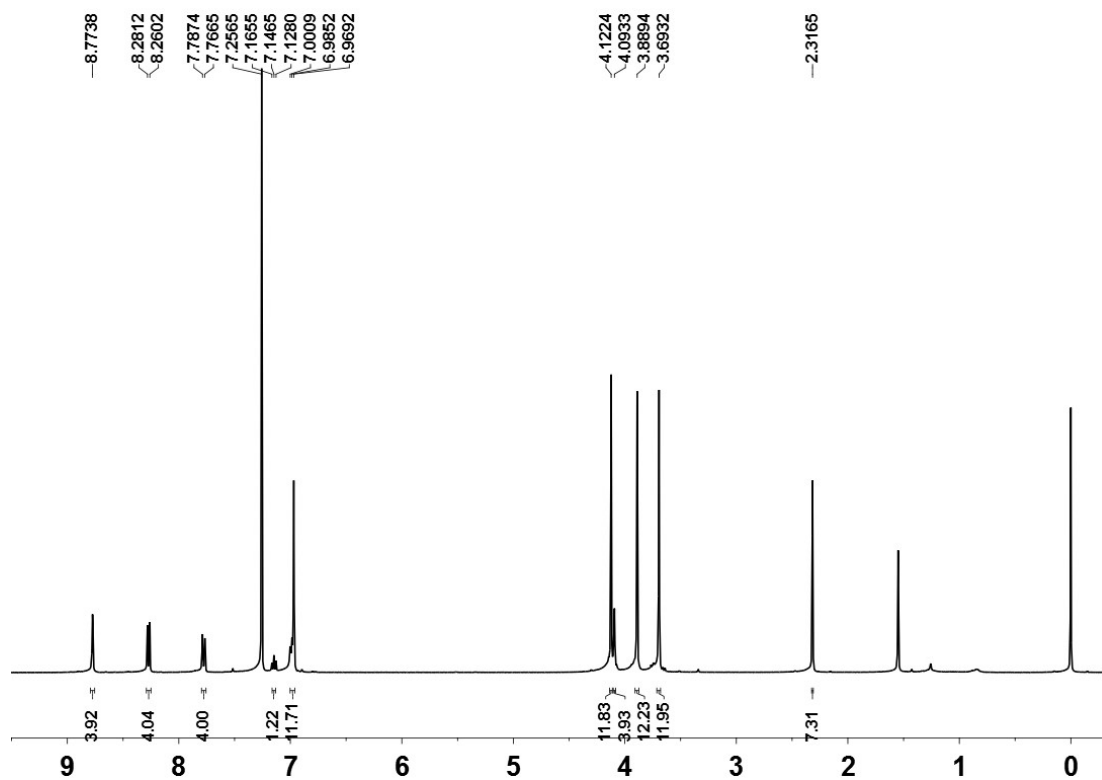

**Figure S7.**  $^1\text{H}$  NMR spectrum (400 MHz,  $\text{CDCl}_3$ , 293 K) of activated **1** after sorption of *mX* vapor for 20 h.

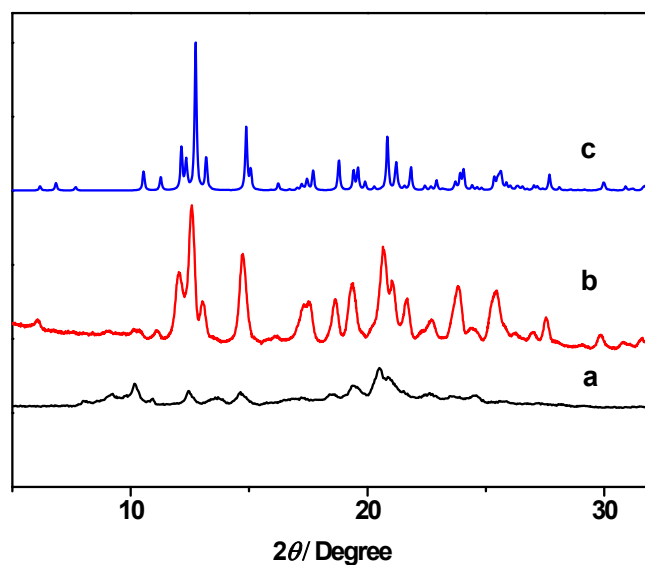

**Figure S8.** PXRD patterns of **1**: (a) original activated **1**; (b) after adsorption of *pX* vapor; (c) simulated from single crystal structure of **1@pX**.

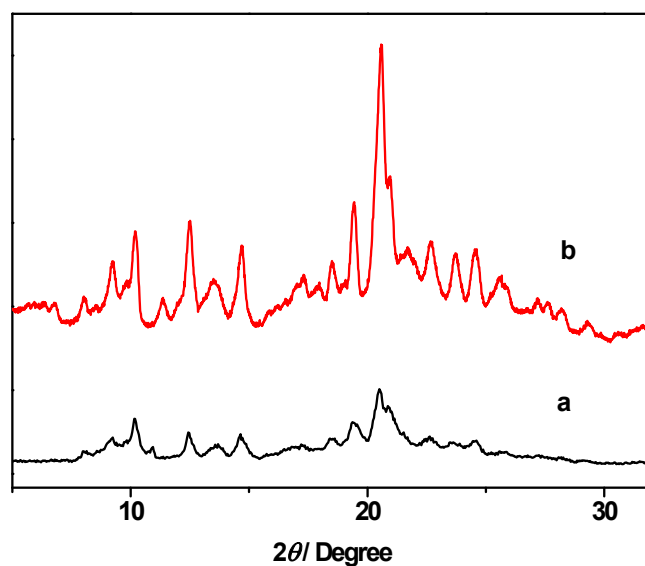

**Figure S9.** PXRD patterns of **1**: (a) original activated **1**; (b) after adsorption of *mX* vapor.

## 6. Uptake from a *pX/mX* Mixture by activated **1**

An open 5 mL vial containing 10mg of guest-free **1** adsorbent was placed in a sealed 20 mL vial containing 1 mL of an equimolar *pX/mX* mixture. Uptake by **1** was



measured hour by hour by completely dissolving the crystals and measuring the ratio of *pX* or *mX* to **1** by  $^1\text{H}$  NMR. The relative uptakes of *pX* and *mX* by **1** was also measured by heating the crystals to release the adsorbed vapor and detecting the relative amounts of **Bz** and **Cy** in the released vapor using gas chromatography.

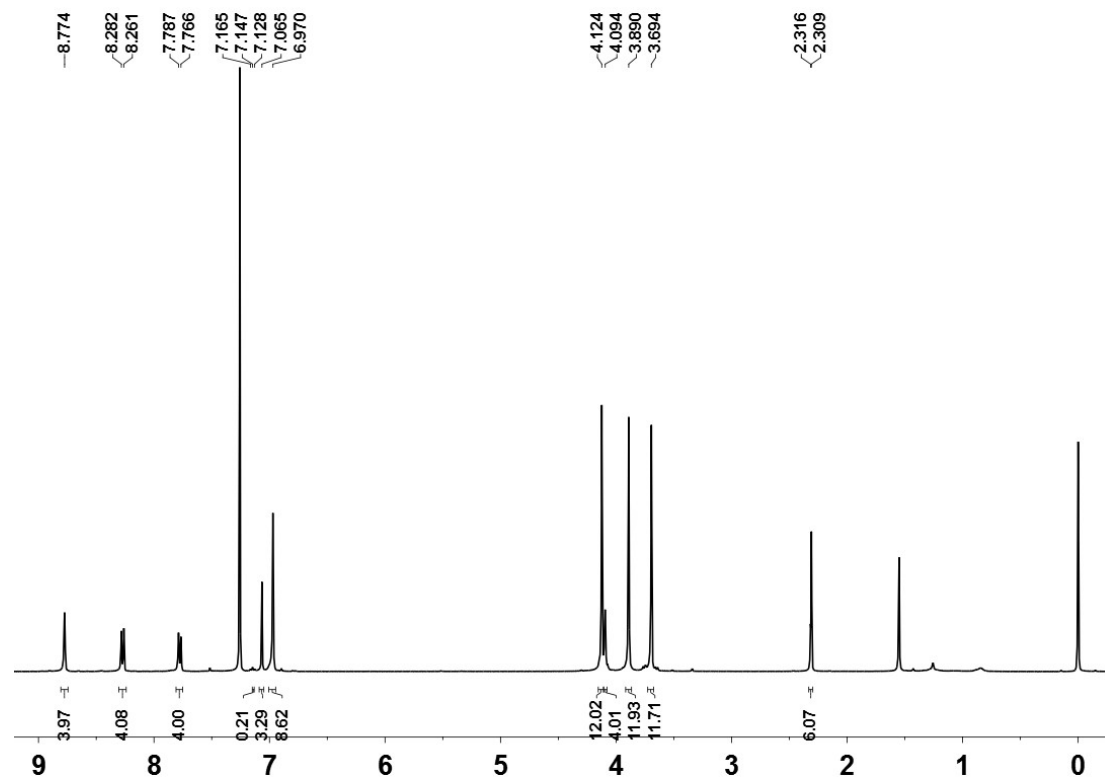

**Figure S10.**  $^1\text{H}$  NMR spectrum (400 MHz,  $\text{CDCl}_3$ , 293 K) of **1** after sorption of an equimolar *pX*/*mX* mixture vapor for 20 h.

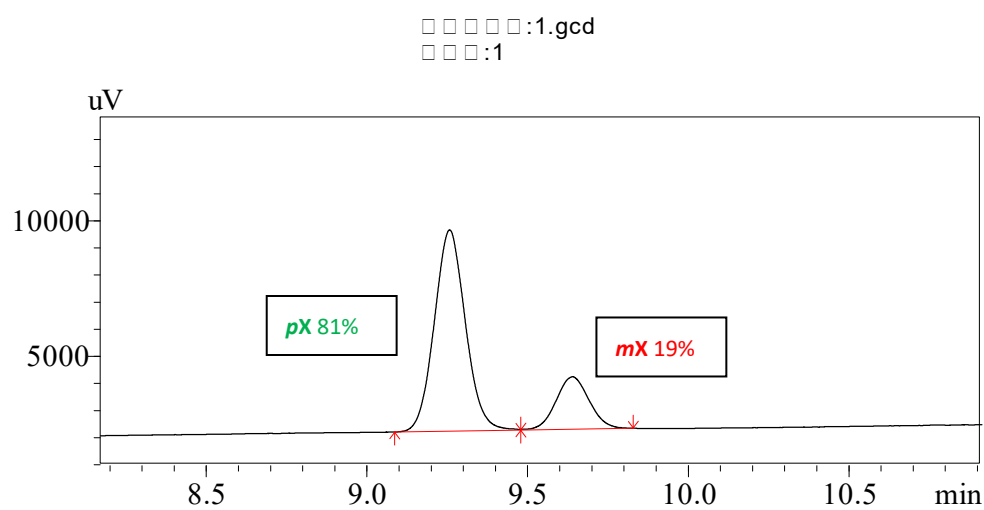

**Figure S11.** Relative uptakes of *pX* and *mX* adsorbed in **1** for 20 h using head space gas chromatography.

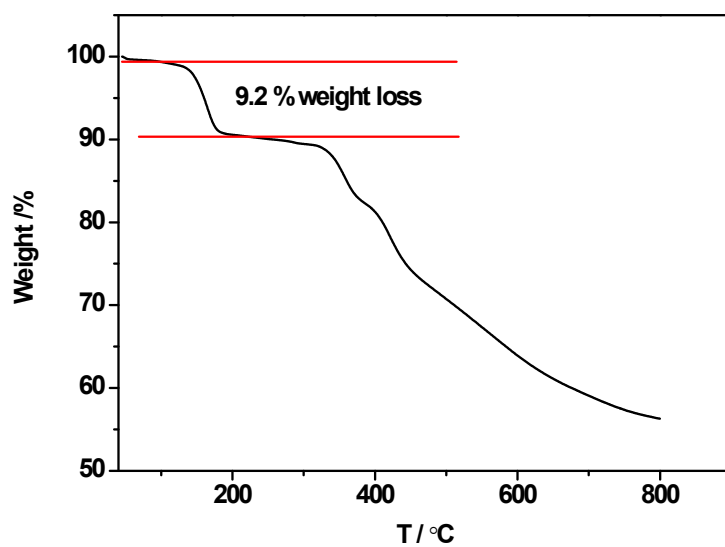

**Figure S12.** Thermogravimetric analysis of **1** after sorption of *pX* and *mX* adsorbed vapor for 20 h.

## 7. Recyclability of **1**

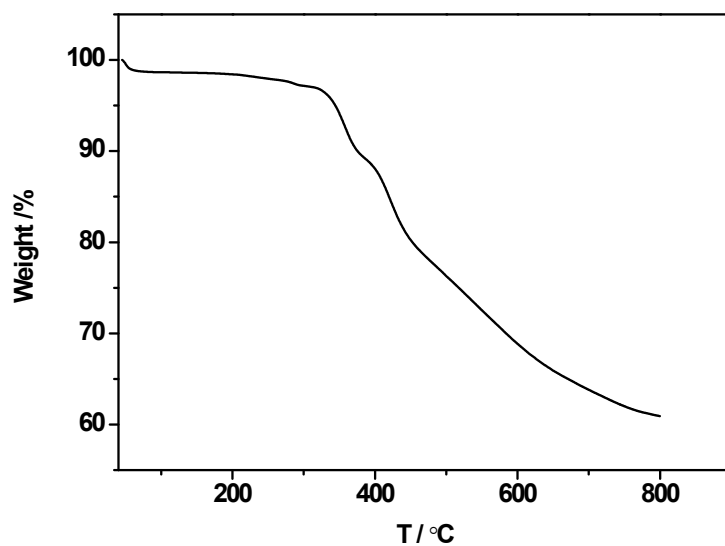

**Figure S13.** Thermogravimetric analysis of **1** after sorption of *pX* and *mX* then heating at 150 °C under vacuum for 3 h.

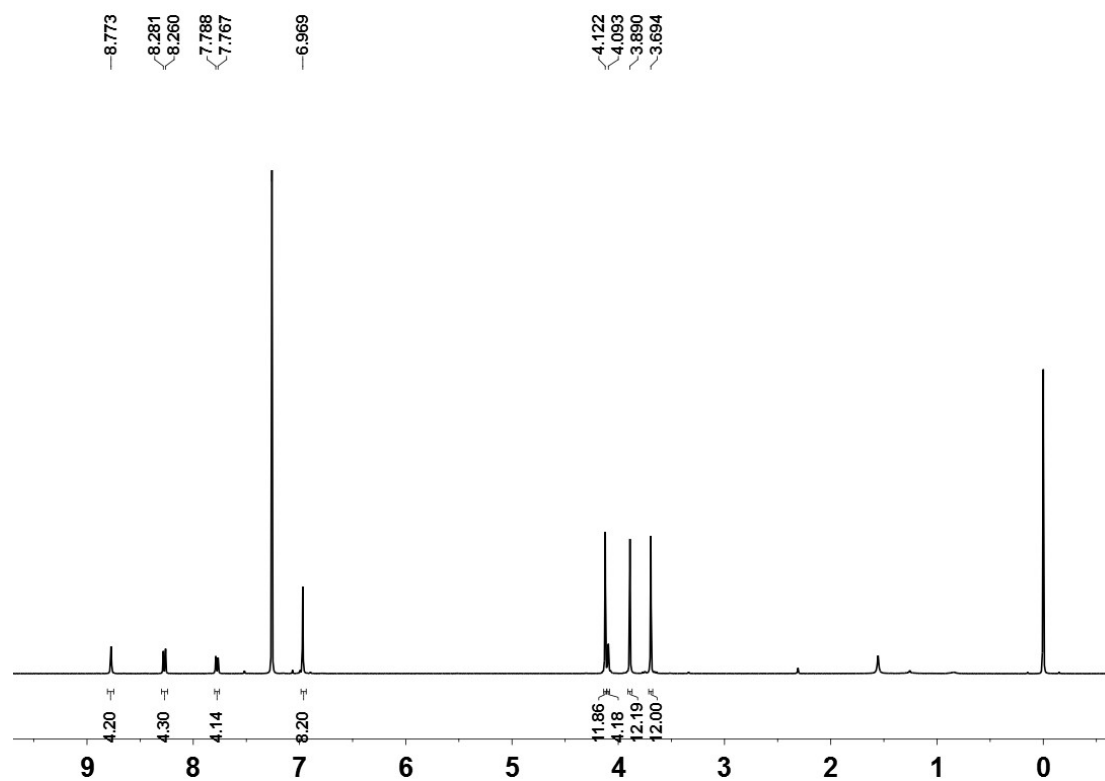

**Figure S14.**  $^1\text{H}$  NMR spectrum (400 MHz,  $\text{CDCl}_3$ , 293 K) of **1** after sorption of *pX* and *mX* then heating at 150 °C under vacuum for 3 h.

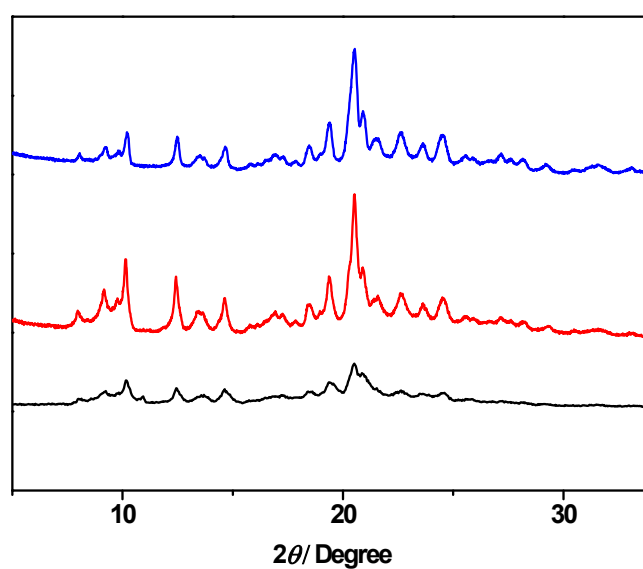

**Figure S15.** Powder X-ray diffraction patterns of **1**: (a) original activated **1**; (b) **1** after sorption of *pX* and *mX* then heating at 150 °C under vacuum for 3 h; (c) **1** after 7 cycles.

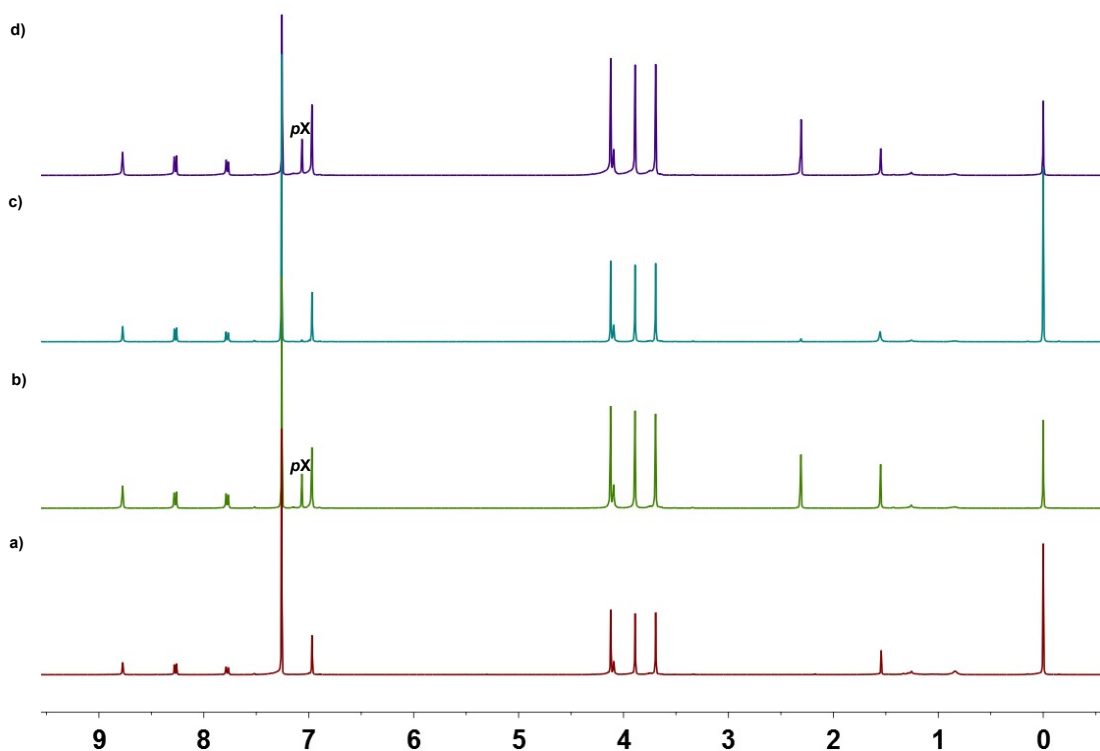

**Figure S16.**  $^1\text{H}$  NMR spectrum (400 MHz,  $\text{CDCl}_3$ , 298K) of (a) original **1**; (b) **1** after adsorption of  $p\text{X}/m\text{X}$  mixture vapor; (c)  $p\text{X}$  loaded **1** crystals after removal of  $p\text{X}$ ; (d) desolvated  $p\text{X}$  loaded **1** crystals after adsorption of  $p\text{X}/m\text{X}$  mixture vapor.

## 8. Crystal data for $1@p\text{X}$ and $1@2m\text{X}$

### $1@p\text{X}$

|                                    |                                           |
|------------------------------------|-------------------------------------------|
| Identification code                | 22022501_0m_a                             |
| Empirical formula                  | $\text{C}_{74}\text{H}_{70}\text{O}_{12}$ |
| Formula weight                     | 1151.30                                   |
| Temperature/K                      | 300.00                                    |
| Crystal system                     | monoclinic                                |
| Space group                        | $P2_1/n$                                  |
| $a/\text{\AA}$                     | 15.047(4)                                 |
| $b/\text{\AA}$                     | 8.2362(19)                                |
| $c/\text{\AA}$                     | 26.661(6)                                 |
| $\alpha/^\circ$                    | 90                                        |
| $\beta/^\circ$                     | 104.502(3)                                |
| $\gamma/^\circ$                    | 90                                        |
| Volume/ $\text{\AA}^3$             | 3198.7(13)                                |
| Z                                  | 2                                         |
| $\rho_{\text{calc}}/\text{g/cm}^3$ | 1.195                                     |

|                                                |                                                               |
|------------------------------------------------|---------------------------------------------------------------|
| $\mu/\text{mm}^{-1}$                           | 0.080                                                         |
| F(000)                                         | 1220.0                                                        |
| Crystal size/ $\text{mm}^3$                    | $0.13 \times 0.12 \times 0.11$                                |
| Radiation                                      | MoK $\alpha$ ( $\lambda = 0.71073$ )                          |
| $2\Theta$ range for data collection/ $^\circ$  | 2.846 to 54.932                                               |
| Index ranges                                   | $-19 \leq h \leq 19, -10 \leq k \leq 10, -34 \leq l \leq 33$  |
| Reflections collected                          | 34096                                                         |
| Independent reflections                        | 7226 [ $R_{\text{int}} = 0.0355, R_{\text{sigma}} = 0.0303$ ] |
| Data/restraints/parameters                     | 7226/850/569                                                  |
| Goodness-of-fit on $F^2$                       | 1.059                                                         |
| Final R indexes [ $I \geq 2\sigma(I)$ ]        | $R_1 = 0.0627, wR_2 = 0.1826$                                 |
| Final R indexes [all data]                     | $R_1 = 0.0899, wR_2 = 0.2054$                                 |
| Largest diff. peak/hole / $e \text{ \AA}^{-3}$ | 0.42/-0.41                                                    |

## 1@2mX

**Table 1 Crystal data and structure refinement for 33.**

|                                             |                                                               |
|---------------------------------------------|---------------------------------------------------------------|
| Identification code                         | 33                                                            |
| Empirical formula                           | C <sub>82</sub> H <sub>80</sub> O <sub>12</sub>               |
| Formula weight                              | 1257.46                                                       |
| Temperature/K                               | 296.15                                                        |
| Crystal system                              | monoclinic                                                    |
| Space group                                 | P2 <sub>1</sub> /n                                            |
| a/Å                                         | 13.879(5)                                                     |
| b/Å                                         | 12.427(4)                                                     |
| c/Å                                         | 19.765(7)                                                     |
| α/°                                         | 90                                                            |
| β/°                                         | 93.893(5)                                                     |
| γ/°                                         | 90                                                            |
| Volume/Å <sup>3</sup>                       | 3401.3(19)                                                    |
| Z                                           | 2                                                             |
| ρ <sub>calc</sub> /g/cm <sup>3</sup>        | 1.228                                                         |
| μ/mm <sup>-1</sup>                          | 0.081                                                         |
| F(000)                                      | 1336.0                                                        |
| Crystal size/mm <sup>3</sup>                | 0.18 × 0.15 × 0.12                                            |
| Radiation                                   | MoKα (λ = 0.71073)                                            |
| 2θ range for data collection/°              | 3.478 to 55.192                                               |
| Index ranges                                | -18 ≤ h ≤ 18, -16 ≤ k ≤ 15, -25 ≤ l ≤ 25                      |
| Reflections collected                       | 37527                                                         |
| Independent reflections                     | 7753 [R <sub>int</sub> = 0.0952, R <sub>sigma</sub> = 0.0959] |
| Data/restraints/parameters                  | 7753/0/432                                                    |
| Goodness-of-fit on F <sup>2</sup>           | 1.008                                                         |
| Final R indexes [I >= 2σ (I)]               | R <sub>1</sub> = 0.0691, wR <sub>2</sub> = 0.1704             |
| Final R indexes [all data]                  | R <sub>1</sub> = 0.1630, wR <sub>2</sub> = 0.2268             |
| Largest diff. peak/hole / e Å <sup>-3</sup> | 0.25/-0.24                                                    |

## 9. Adsorption kinetic analysis using three models

$$n_t = k_p t^{0.5} + C \quad (\text{eq. S3}) \text{ where } k_p \text{ is the rate constant for intra-particle diffusion.}$$

$$n_t = n_{eq} - n_{eq} e^{-k_1 t} \quad (\text{eq. S4}) \text{ where } k_1 \text{ is the rate constant for pseudo-first-order adsorption.}$$

$$n_t = \frac{1}{1 - k_2 n_{eq}^2 t} - 1 \quad (\text{eq. S5}) \text{ where } k_2 \text{ is the rate constant for pseudo-second-order adsorption}$$

$n_{eq}$  and  $n_t$  represent the amount of adsorbate adsorbed per amount of adsorbent determined at equilibrium and time  $t$ , respectively.

The data did not fit well with either PFO or PSO, indicating the experimental

conditions (e.g., the concentration of  $pX$  and  $mX$  and the dosage of NAC) did not meet the extreme conditions where the initial adsorbate concentration to the adsorbent maximum capacity should be higher than a threshold

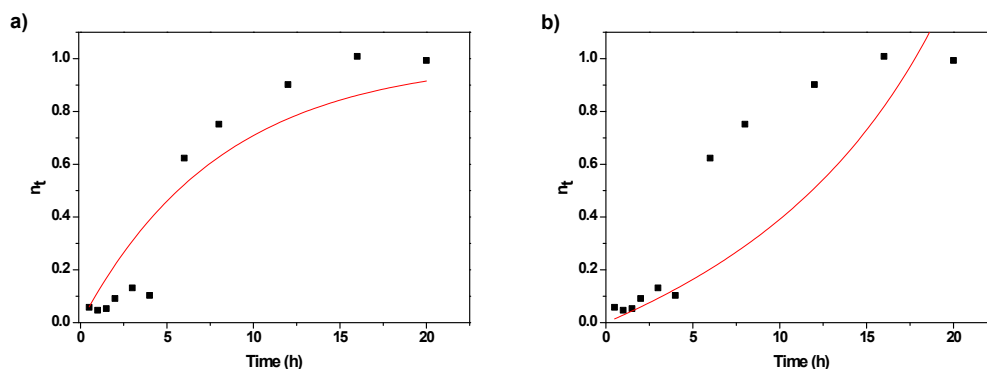

**Figure S17.** The adsorption kinetics data of  $pX$  vapor onto **1** were fitted with (a) PFO models, and (b) PSO models. (IPD models cannot fit)

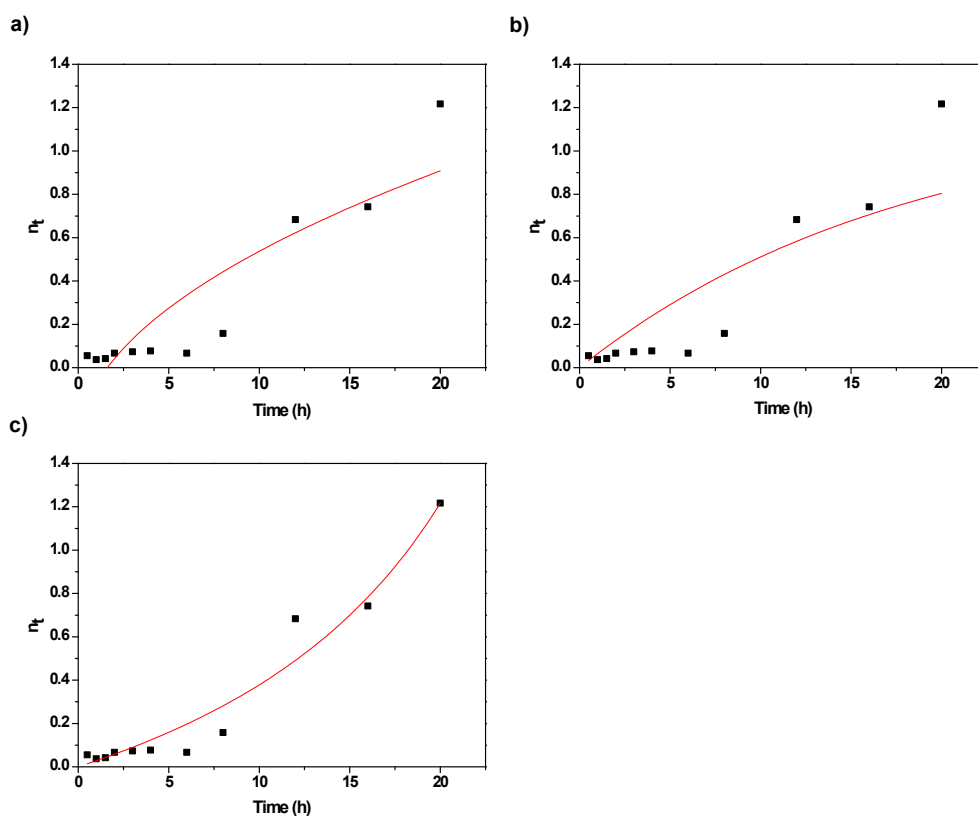

**Figure S18.** The adsorption kinetics data of  $mX$  vapor onto **1** were fitted with (a) IPD models, (b) PFO models, and (c) PSO models.
